# Supplementary material for: Fibroblast miR-210 overexpression is independently associated with clinical failure in Prostate Cancer – a multicenter (in situ hybridization) study
Source: PubMed Central journal article supplement (PMC5099893; doi:10.1038/srep36573), 2016-11-08
Supplement: srep36573-s1.pdf [file srep36573-s1.pdf]

# **Fibroblast miR-210 overexpression is independently associated with clinical failure in Prostate Cancer – a multicenter (*in situ* hybridization) study**

Sigve Andersen, PhD, M.D.<sup>1,2</sup>

Elin Richardsen, PhD, M.D.<sup>3,4</sup>

Line Moi PhD, M.D.<sup>3,4</sup>

Tom Donnem, PhD, M.D.<sup>1,2</sup>

Yngve Nordby, M.D.<sup>1,5</sup>

Nora Ness,<sup>3</sup>

Marte Eilertsen Holman, PhD, M.D.<sup>1,2</sup>

Roy M. Bremnes, PhD, M.D.<sup>1,2</sup>

Lill-Tove Busund, PhD, M.D.<sup>3,4</sup>

<sup>1</sup>Translational Cancer Research Group, Dept Clinical Medicine, UiT, The Arctic University of Norway

<sup>2</sup>Dept Oncology, University Hospital of North Norway, Tromso

<sup>3</sup>Translational Cancer Research Group, Dept of Medical Biology, UiT, The Arctic University of Norway

<sup>4</sup>Dept Pathology, University Hospital of North Norway, Tromso

<sup>5</sup>Dept of Urology, University Hospital of North Norway, Tromso

## **Corresponding author:**

Sigve Andersen, PhD, MD

Department of Oncology

University Hospital of North Norway

9038 Tromso, Norway

Telephone: +47 77 62 60 00 Fax: +47 77 62 67 79

E-mail: sigve.andersen@uit.no

## Staining controls of miR-210

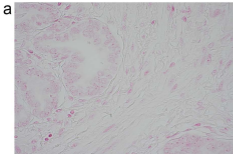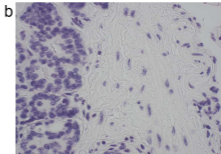

400x microscope pictures of a) negative control of miR-210 staining (scramble) and b) positive control of miR-210 staining (U6).
